# Supplementary material for: Multiple Pathways To Avoid Beta Interferon Sensitivity of HIV-1 by Mutations in Capsid
Source: PubMed Central journal article supplement (PMC6854511; doi:10.1128/jvi.00986-19), 2019-11-13
Supplement: JVI.00986-19-s0004.pdf [file JVI.00986-19-s0004.pdf]

1 **Supplemental Material**

2

3 **S1 Movie. Time-lapse image of a centered, dual-labeled HIV RGDA/Q112D particle**  
4 **challenging a Jurkat cell.**

5 The mean intensity of the tracked particle is plotted (y axis) for iGFP (green) and  
6 tdTomato-Vpr (red) signals (Top Left). The first drop of GFP signal occurs with fusion  
7 and a second total drop occurs when the capsid integrity is lost (at ~18 minutes after  
8 fusion). The Right panel shows the signal for iGFP (green), tdTomato-Vpr (red), and  
9 bright field signal for cell reference (gray). Particle box shows the signal of GFP (green)  
10 and tdTomato-Vpr (red) over time. (Bottom Left) Smaller boxes show the signal (gray) of  
11 each individual fluorescence measurement as labeled and mixed signal for iGFP  
12 (green) and tdTomato-Vpr (red).

13

14 **S2 Movie. Time-lapse image of a centered, dual-labeled HIV wild-type particle**  
15 **challenging a Jurkat cell.**

16 The mean intensity of the tracked particle is plotted (y axis) for iGFP (green) and  
17 tdTomato-Vpr (red) signals (Top Left). The first drop of GFP signal occurs with fusion  
18 and a second total drop occurs when the capsid integrity is lost (at ~45 minutes after  
19 fusion). The Right panel shows the signal for iGFP (green), tdTomato-Vpr (red), and  
20 bright field signal for cell reference (gray). Particle box shows the signal of GFP (green)  
21 and tdTomato-Vpr (red) over time. (Bottom Left) Smaller boxes show the signal (gray) of  
22 each individual fluorescence measurement as labeled and mixed signal for iGFP  
23 (green) and tdTomato-Vpr (red).

24

25 **S3 Movie. Time-lapse image of a centered, dual-labeled HIV RGDA/Q112D+Q4R**  
26 **particle challenging a Jurkat cell.**

27 The mean intensity of the tracked particle is plotted (y axis) for iGFP (green) and  
28 tdTomato-Vpr (red) signals (Top Left). The first drop of GFP signal occurs with fusion  
29 and a second total drop occurs when the capsid integrity is lost (at ~10 minutes after  
30 fusion). The Right panel shows the signal for iGFP (green), tdTomato-Vpr (red), and  
31 bright field signal for cell reference (gray). Particle box shows the signal of GFP (green)  
32 and tdTomato-Vpr (red) over time. (Bottom Left) Smaller boxes show the signal (gray) of  
33 each individual fluorescence measurement as labeled and mixed signal for iGFP  
34 (green) and tdTomato-Vpr (red).
